# Supplementary material
Source: PubMed Central journal article supplement (PMC3144107)
Supplement: supp_90.3.311_DS_10.1177_0022034510387430.pdf [file supp_90.3.311_DS_10.1177_0022034510387430.pdf]

Y. Wang<sup>1</sup>, H. Kong<sup>1</sup>,  
G. Mues<sup>1</sup>, and R. D'Souza<sup>1\*</sup>

<sup>1</sup>Department of Biomedical Sciences, Texas A&M University Health Science Center Baylor College of Dentistry, 3302 Gaston Ave., Dallas, TX 75246, USA; \*corresponding author, rdsouza@bcd.tamhsc.edu.

*J Dent Res* 90(3):311-316, 2011

APPENDIX

# Msx1 Mutations: How Do They Cause Tooth Agenesis?

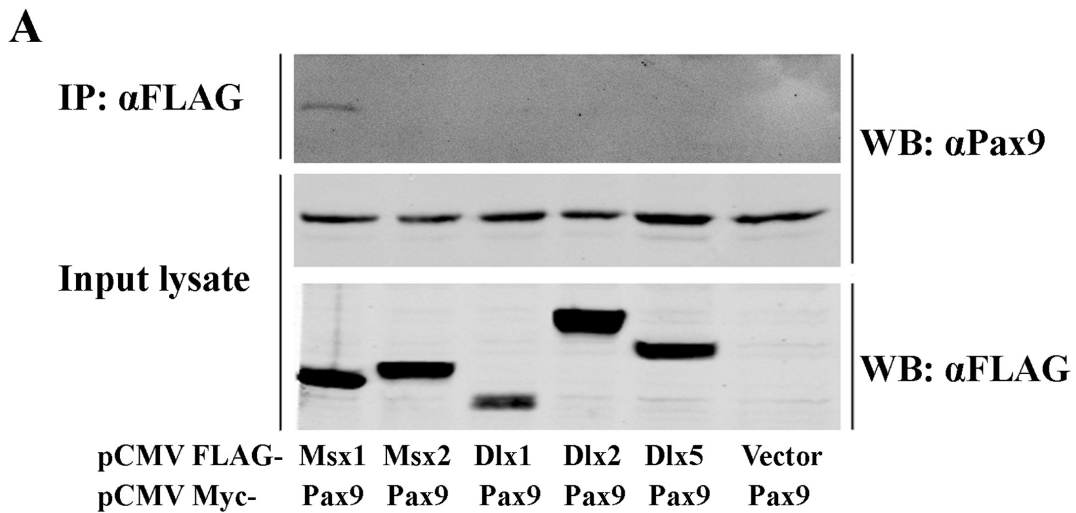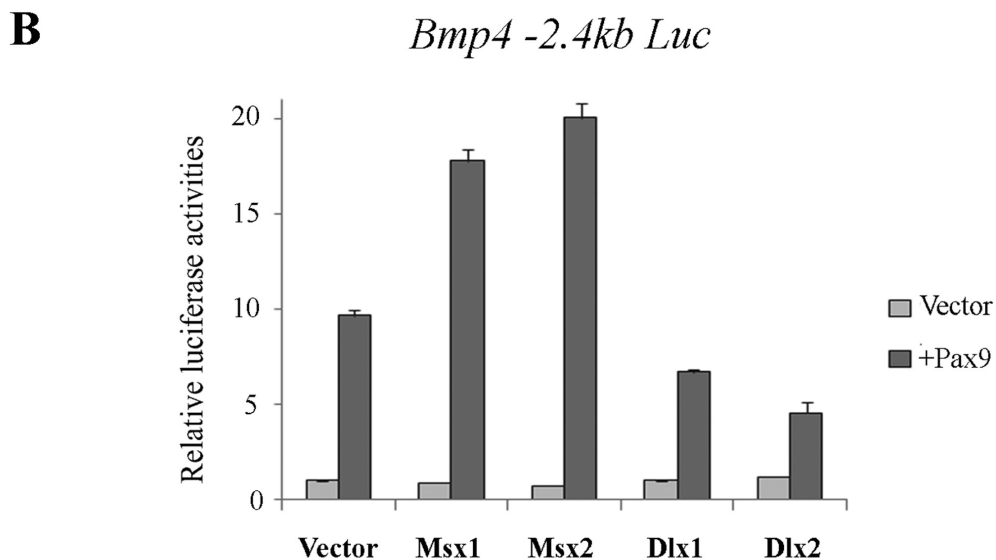

**Appendix Figure.** Co-immunoprecipitation assay and reporter assay with Msx and Dlx proteins. **(A)** COS7 cells co-transfected with Myc-tagged Pax9 proteins and FLAG-tagged Msx or Dlx proteins. Upper panel: Western blot analyses of immunoprecipitates of whole cell lysates pulled down with anti-FLAG antibody and probed with an anti-Pax9 antibody. Middle panel: Whole cell lysates probed with anti-Pax9 antibody or (lower panel) anti-Flag antibody. **(B)** *Bmp4* promoter-reporter constructs (p2.4 *Bmp4*-luciferase) were co-transfected with the different Msx/Dlx expression vectors alone (in light gray) or together with the wildtype Pax9 expression vector (in dark gray) at a 1:2 ratio.
